# Supplementary material for: Evaluating the Effects of COVID-19 and Vaccination on Employment Behaviour: A Panel Data Analysis Acrossthe World
Source: MDPI journal article supplement (doi:10.3390/su14159675), 2022-08-05
Supplement: s1 [file s1]

## Supplementary Materials

### Results

**Table S1.** Descriptive statistics

|           |         | N   | Minimum   | Maximum      | Mean          | Std. Deviation |
|-----------|---------|-----|-----------|--------------|---------------|----------------|
| Dependent |         |     |           |              |               |                |
| Variable  | Et      | 424 | 193.70    | 15981.405384 | 27852.5465876 | 27852.5465876  |
| Covariate | Tcases  | 424 | 0         | 157261.14    | 1149271.178   | 1149271.178    |
|           | Tvaccs  | 424 | 0         | 7153.92      | 135802.578    | 135802.578     |
|           | LF15+   | 424 | 203.70    | 17235.200896 | 29847.6956511 | 29847.6956511  |
|           | Et-1    | 424 | 193.70    | 16028.695644 | 27961.7030297 | 27961.7030297  |
|           | Et-2    | 424 | 194.40    | 16099.300531 | 28113.0650175 | 28113.0650175  |
|           | VGDPT-1 | 424 | -67529.60 | 24240.703538 | 73593.3163652 | 73593.3163652  |
|           | Dumm1   | 424 | 0         | 1            | .38           | .485           |
|           | Dumm2   | 424 | 0         | 1            | .07           | .249           |
|           | AP      | 424 | 942.6179  | 17302.927322 | 13184.0769783 | 13184.0769783  |

**Table S2.** Correlation matrix form1

|                 |         | Et    | Et-1  | Et-2  | VGDPT-1 | AP    | LF15+ | Tvacc | Tcases |
|-----------------|---------|-------|-------|-------|---------|-------|-------|-------|--------|
| Pearson         | Et      | 1.000 | .951  | .949  | .828    | .999  | .788  | .     | .      |
| Correlation     | Et-1    | .951  | 1.000 | .999  | .846    | .949  | .770  | .     | .      |
|                 | Et-2    | .949  | .999  | 1.000 | .841    | .948  | .759  | .     | .      |
|                 | VGDPT-1 | .828  | .846  | .841  | 1.000   | .818  | .935  | .     | .      |
|                 | AP      | -.049 | -.042 | -.040 | .187    | -.055 | .157  | .     | .      |
|                 | LF15+   | .999  | .949  | .948  | .818    | 1.000 | .775  | .     | .      |
|                 | Tvacc   | .788  | .770  | .759  | .935    | .775  | 1.000 | 1.000 | .      |
|                 | Tcases  | .896  | .896  | .894  | .947    | .897  | .916  | .     | 1.000  |
| Sig. (1-tailed) | Et      | .     | .000  | .000  | .000    | .000  | .000  | .000  | .000   |
|                 | Et-1    | .000  | .     | .000  | .000    | .000  | .000  | .000  | .000   |
|                 | Et-2    | .000  | .000  | .     | .000    | .000  | .000  | .000  | .000   |
|                 | VGDPT-1 | .000  | .000  | .000  | .       | .000  | .000  | .000  | .000   |
|                 | AP      | .376  | .393  | .399  | .112    | .360  | .155  | .288  | .288   |
|                 | LabF15+ | .000  | .000  | .000  | .000    | .     | .000  | .000  | .000   |
|                 | Tvacc   | .000  | .000  | .000  | .000    | .000  | .     | .000  | .000   |
|                 | Tcases  | .000  | .000  | .000  | .000    | .000  | .000  | .     | .      |
| N               | Et      | 44    | 44    | 44    | 44      | 44    | 44    | 44    | 44     |
|                 | Et-1    | 44    | 44    | 44    | 44      | 44    | 44    | 44    | 44     |
|                 | Et-2    | 44    | 44    | 44    | 44      | 44    | 44    | 44    | 44     |
|                 | VGDPT-1 | 44    | 44    | 44    | 44      | 44    | 44    | 44    | 44     |
|                 | AP      | 44    | 44    | 44    | 44      | 44    | 44    | 44    | 44     |
|                 | LF15+   | 44    | 44    | 44    | 44      | 44    | 44    | 44    | 44     |
|                 | Tvacc   | 44    | 44    | 44    | 44      | 44    | 44    | 44    | 44     |
|                 | Tcases  | 44    | 44    | 44    | 44      | 44    | 44    | 44    | 44     |

**Table S3.**Correlation matrix form2

|                        |         | Et    | Et-1  | Et-2  | VGDPt-1 | AP    | Dumm1 | Dumm2 | LF15+ |
|------------------------|---------|-------|-------|-------|---------|-------|-------|-------|-------|
| Pearson<br>Correlation | Et      | 1.000 | .951  | .949  | .828    | -.049 | .     | .     | .999  |
|                        | Et-1    | .951  | 1.000 | .999  | .846    | -.042 | .     | .     | .949  |
|                        | Et-2    | .949  | .999  | 1.000 | .841    | -.040 | .     | .     | .948  |
|                        | VGDPt-1 | .828  | .846  | .841  | 1.000   | .187  | .     | .     | .818  |
|                        | AP      | -.049 | -.042 | -.040 | .187    | 1.000 | .     | .     | -.055 |
|                        | Dumm1   | .     | .     | .     | .       | .     | 1.000 | .     | .     |
|                        | Dumm2   | .     | .     | .     | .       | .     | .     | 1.000 | .     |
|                        | LF15+   | .999  | .949  | .948  | .818    | -.055 | .     | .     | 1.000 |
| Sig. (1-<br>tailed)    | Et      | .     | .000  | .000  | .000    | .376  | .000  | .000  | .000  |
|                        | Et-1    | .000  | .     | .000  | .000    | .393  | .000  | .000  | .000  |
|                        | Et-2    | .000  | .000  | .     | .000    | .399  | .000  | .000  | .000  |
|                        | VGDPt-1 | .000  | .000  | .000  | .       | .112  | .000  | .000  | .000  |
|                        | AP      | .376  | .393  | .399  | .112    | .     | .000  | .000  | .360  |
|                        | Dumm1   | .000  | .000  | .000  | .000    | .000  | .     | .000  | .000  |
|                        | Dumm2   | .000  | .000  | .000  | .000    | .000  | .000  | .     | .000  |
|                        | LF15+   | .000  | .000  | .000  | .000    | .360  | .000  | .000  | .     |
| N                      | Et      | 44    | 44    | 44    | 44      | 44    | 44    | 44    | 44    |
|                        | Et-1    | 44    | 44    | 44    | 44      | 44    | 44    | 44    | 44    |
|                        | Et-2    | 44    | 44    | 44    | 44      | 44    | 44    | 44    | 44    |
|                        | VGDPt-1 | 44    | 44    | 44    | 44      | 44    | 44    | 44    | 44    |
|                        | AP      | 44    | 44    | 44    | 44      | 44    | 44    | 44    | 44    |
|                        | Dumm1   | 44    | 44    | 44    | 44      | 44    | 44    | 44    | 44    |
|                        | Dumm2   | 44    | 44    | 44    | 44      | 44    | 44    | 44    | 44    |
|                        | LF15+   | 44    | 44    | 44    | 44      | 44    | 44    | 44    | 44    |

**Results of Regression Estimation****Table S4.**Regression- goodness of fit<sup>b</sup>

|                                      | Value     | df  | Value/df    |
|--------------------------------------|-----------|-----|-------------|
| Deviance                             | 5.388E8   | 416 | 1295195.626 |
| Scaled Deviance                      | 424.000   | 416 |             |
| Pearson Chi-Square                   | 5.388E8   | 416 | 1295195.626 |
| Scaled Pearson Chi-Square            | 424.000   | 416 |             |
| Log Likelihood <sup>a</sup>          | -3581.316 |     |             |
| Akaike's Information Criterion (AIC) | 7180.632  |     |             |
| Finite Sample Corrected AIC (AICC)   | 7181.067  |     |             |
| Bayesian Information Criterion (BIC) | 7217.080  |     |             |
| Consistent AIC (CAIC)                | 7226.080  |     |             |

a. The full log likelihood function is displayed and used in computing information criteria.

b. Information criteria are in small-is-better form.

**Table S5.** Omnibus test<sup>a</sup> of the model form 1

| Likelihood Ratio Chi-Square | df | Sig. |
|-----------------------------|----|------|
| 2718.635                    | 7  | .000 |

Dependent variable: Et

Model: (intercept), t\_cases, t\_Vacc, LF, Et-1,Et-2, VGDPt-1, AP

a. Compares the fitted model against the intercept – only model

**Table S6.** Autocorrelation, Series:Et

| Lag | Autocorrelation | Std. Error <sup>a</sup> | Box-Ljung Statistic |    |                   |
|-----|-----------------|-------------------------|---------------------|----|-------------------|
|     |                 |                         | Value               | df | Sig. <sup>b</sup> |
| 1   | .915            | .047                    | 371.222             | 1  | .000              |
| 2   | .840            | .047                    | 685.220             | 2  | .000              |
| 3   | .769            | .047                    | 949.202             | 3  | .000              |
| 4   | .688            | .047                    | 1160.733            | 4  | .000              |
| 5   | .605            | .047                    | 1324.613            | 5  | .000              |
| 6   | .521            | .047                    | 1446.679            | 6  | .000              |
| 7   | .440            | .047                    | 1533.708            | 7  | .000              |
| 8   | .370            | .047                    | 1595.538            | 8  | .000              |
| 9   | .295            | .047                    | 1635.038            | 9  | .000              |
| 10  | .224            | .047                    | 1657.559            | 10 | .000              |
| 11  | .205            | .047                    | 1676.607            | 11 | .000              |
| 12  | .189            | .047                    | 1692.795            | 12 | .000              |
| 13  | .175            | .047                    | 1706.796            | 13 | .000              |
| 14  | .160            | .047                    | 1718.439            | 14 | .000              |
| 15  | .144            | .047                    | 1727.963            | 15 | .000              |
| 16  | .129            | .047                    | 1735.572            | 16 | .000              |

a. The underlying process assumed is independence (white noise).

b. Based on the asymptotic chi-square approximation.

**Table S7.** Partial autocorrelation, Et

| Lag | Partial Autocorrelation | Std. Error |
|-----|-------------------------|------------|
| 1   | .915                    | .049       |
| 2   | .022                    | .049       |
| 3   | -.014                   | .049       |
| 4   | -.103                   | .049       |
| 5   | -.066                   | .049       |
| 6   | -.058                   | .049       |
| 7   | -.041                   | .049       |
| 8   | .022                    | .049       |
| 9   | -.072                   | .049       |
| 10  | -.037                   | .049       |
| 11  | .260                    | .049       |
| 12  | .037                    | .049       |
| 13  | .008                    | .049       |
| 14  | -.071                   | .049       |
| 15  | -.044                   | .049       |
| 16  | -.043                   | .049       |

**Table S8.** Parameter estimates of the model form 1

| Parameter   | B           | Std. Error | 95% Wald Confidence Interval |           |
|-------------|-------------|------------|------------------------------|-----------|
|             |             |            | Lower                        | Upper     |
| (Intercept) | 82.437      | 160.0186   | -231.194                     | 396.067   |
| t_vacc      | .001        | .0010      | -.001                        | .002      |
| t_cases     | .000        | .0001      | -.001                        | -7.033E-5 |
| LF15        | .446        | .1727      | .107                         | .784      |
| Et-1        | .729        | .2690      | .202                         | 1.256     |
| Et-2        | -.199       | .1368      | -.468                        | .069      |
| VGDPT-1     | -.006       | .0075      | -.021                        | .009      |
| AP          | .001        | .0050      | -.009                        | .011      |
| (Scale)     | 1831151.436 |            |                              |           |

**Table S9.**Hypothesis test of the model form 1

| Parameter   | Hypothesis Test |    |      |
|-------------|-----------------|----|------|
|             | Wald Chi-Square | df | Sig. |
| (Intercept) | .265            | 1  | .606 |
| t_vacc      | .316            | 1  | .574 |
| t_cases     | 6.001           | 1  | .014 |
| LF15        | 6.651           | 1  | .010 |
| Et-1        | 7.347           | 1  | .007 |
| Et-2        | 2.123           | 1  | .145 |
| VGDPT-1     | .675            | 1  | .411 |
| AP          | .024            | 1  | .876 |
| (Scale)     |                 |    |      |

Dependent Variable: Et

Model: (Intercept), t\_vacc,, t\_cases, LF15, Et-1, Et-2, VGDPT-1, AP

**Table S10.** Parameter estimates of the model form 2

| Parameter   | B                        | Std. Error | 95% Wald Confidence Interval |             |
|-------------|--------------------------|------------|------------------------------|-------------|
|             |                          |            | Lower                        | Upper       |
| (Intercept) | 163.523                  | 118.0876   | -67.925                      | 394.970     |
| LF15        | .399                     | .0294      | .342                         | .457        |
| Et-1        | .463                     | .0519      | .361                         | .565        |
| Et-2        | .095                     | .0476      | .002                         | .189        |
| VGDPT-1     | .005                     | .0015      | .002                         | .008        |
| AP          | -.003                    | .0046      | -.012                        | .006        |
| Dumm1       | -331.552                 | 124.2950   | -575.166                     | -87.938     |
| Dumm2       | 406.646                  | 250.8786   | -85.067                      | 898.359     |
| (Scale)     | 1296194.373 <sup>a</sup> | 89022.9951 | 1132946.416                  | 1482964.975 |

**Table S11.**Hypothesis test of the model form 2

| Parameter   | Hypothesis Test |    |      |
|-------------|-----------------|----|------|
|             | Wald Chi-Square | df | Sig. |
| (Intercept) | 1.918           | 1  | .166 |
| LF15        | 184.295         | 1  | .000 |
| Et-1        | 79.519          | 1  | .000 |
| Et-2        | 4.012           | 1  | .045 |
| VGDPT-1     | 11.661          | 1  | .001 |
| AP          | .321            | 1  | .571 |
| Dumm1       | 7.115           | 1  | .008 |
| Dumm2       | 2.627           | 1  | .105 |
| (Scale)     |                 |    |      |

Dependent Variable: EmptQ

Model: (Intercept), LabF15, EmptQ1, EmplQ2, VarQt1, Pmoy, Dumm1, Dumm2

a. Maximum likelihood estimate.

## Results of Fixed Effect Model

**Table S12.**Information criteria<sup>a</sup>of the model form 1

|                                      |          |
|--------------------------------------|----------|
| -2 Restricted Log Likelihood         | 5481.580 |
| Akaike's Information Criterion (AIC) | 5591.580 |
| Hurvich and Tsai's Criterion (AICC)  | 5608.691 |
| Bozdogan's Criterion (CAIC)          | 5868.268 |
| Schwarz's Bayesian Criterion (BIC)   | 5813.268 |

The information criteria are displayed in smaller-is-better forms.

a. Dependent Variable: Et.

**Table S13.**Estimates of Fixed Effects<sup>a</sup>of the model form 1

| Parameter | Estimate     | Std. Error  | df     | t       | Sig. | 95% Confidence Interval |              |
|-----------|--------------|-------------|--------|---------|------|-------------------------|--------------|
|           |              |             |        |         |      | Lower Bound             | Upper Bound  |
| Intercept | 314.314251   | 84.751345   | 4.274  | 3.709   | .018 | 84.830035               | 543.798468   |
| LF15      | .939507      | .003593     | 21.918 | 261.490 | .000 | .932054                 | .946960      |
| Et-1      | .045371      | .003902     | 65.616 | 11.628  | .000 | .037580                 | .053162      |
| Et-2      | .002644      | .001556     | 9.483  | 1.699   | .122 | -.000848                | .006137      |
| VGDPT-1   | .000636      | .000137     | 48.327 | 4.639   | .000 | .000360                 | .000911      |
| AP        | -.013002     | .003701     | 6.966  | -3.514  | .010 | -.021762                | -.004243     |
| t_vacc    | .000109      | 2.147172E-5 | 39.621 | 5.071   | .000 | 6.548351E-5             | .000152      |
| t_cases   | -7.049263E-5 | 5.655245E-6 | 37.391 | -12.465 | .000 | -8.194721E-5            | -5.903806E-5 |

a. Dependent Variable: Et.

**Table S14.**Information Criteria<sup>a</sup>of the model form 2

|                                      |          |
|--------------------------------------|----------|
| -2 Restricted Log Likelihood         | 5432.171 |
| Akaike's Information Criterion (AIC) | 5542.171 |
| Hurvich and Tsai's Criterion (AICC)  | 5559.283 |
| Bozdogan's Criterion (CAIC)          | 5818.859 |
| Schwarz's Bayesian Criterion (BIC)   | 5763.859 |

The information criteria are displayed in smaller-is-better forms.

a. Dependent Variable: Et.

**Table S15.**Estimates of Fixed Effects<sup>a</sup>of the model form 2

| Parameter | Estimate   | Std. Error  | df     | t       | Sig. | 95% Confidence Interval |             |
|-----------|------------|-------------|--------|---------|------|-------------------------|-------------|
|           |            |             |        |         |      | Lower Bound             | Lower Bound |
| Intercept | -16.478804 | 93.392475   | 50.350 | -.176   | .861 | -204.030768             | 171.073161  |
| EmptQ1    | .055223    | .002912     | 69.336 | 18.967  | .000 | .049415                 | .061031     |
| EmplQ2    | -.007326   | .001781     | 20.448 | -4.114  | .001 | -.011035                | -.003616    |
| VarQt1    | .000637    | 9.665866E-5 | 20.742 | 6.591   | .000 | .000436                 | .000838     |
| LabF15    | .947212    | .003545     | 62.514 | 267.201 | .000 | .940127                 | .954297     |
| Pmoy      | -.009875   | .002656     | 15.999 | -3.718  | .002 | -.015506                | -.004244    |
| Dumm1     | -15.768382 | 7.678031    | 42.945 | -2.054  | .046 | -31.253183              | -.283580    |
| Dumm2     | -29.816969 | 7.664524    | 14.513 | -3.890  | .002 | -46.201394              | -13.432543  |

a. Dependent Variable: Et

## Results of Random Effect Model

**Table S16.**Information Criteria<sup>a</sup>of the model form 1

|                                      |          |
|--------------------------------------|----------|
| -2 Restricted Log Likelihood         | 9504.084 |
| Akaike's Information Criterion (AIC) | 9630.084 |
| Hurvich and Tsai's Criterion (AICC)  | 9652.993 |
| Bozdogan's Criterion (CAIC)          | 9947.017 |
| Schwarz's Bayesian Criterion (BIC)   | 9884.017 |

a. Dependent Variable: Et.

**Table S17.**Estimates of Random Effects<sup>a</sup>of the model form 1

| Parameter | Estimate   | Std. Error  | df   | t     | Sig.  | 95% Confidence Interval |              |
|-----------|------------|-------------|------|-------|-------|-------------------------|--------------|
|           |            |             |      |       |       | Lower Bound             | Upper Bound  |
| Intercept | 524.514410 | 1950.538066 | .000 | .269  | 1.000 | -22229.462988           | 23278.491807 |
| t_vacc    | -.589583   | 40.251602   | .000 | -.015 | .000  | -.601760                | -.577406     |
| LabF15    | .733206    | 25.678145   | .000 | .029  | 1.000 | -101.728906             | 103.195318   |
| Et-1      | .031859    | 25.682960   | .000 | .001  | 1.000 | -20.960422              | 21.024139    |
| Et-2      | -.041244   | 25.670187   | .000 | -.002 | 1.000 | -177.996990             | 177.914503   |
| VGDPT-1   | -.008194   | 25.630292   | .000 | .000  | 1.000 | -21.485055              | 21.468667    |
| AP        | -.259931   | 25.636555   | .000 | -.010 | 1.000 | -257.489115             | 256.969254   |
| t_cases   | -.004090   | 25.538888   | .000 | .000  | .000  | -.007618                | -.000562     |

a. Dependent Variable: Et.
